# Supplementary material for: Evaluating Smart Community Development in China from the Perspective of Residents’ Sense of Safety: An Analysis Using Criteria Importance through Intercriteria Correlation and Fuzzy Comprehensive Evaluation Approaches
Source: MDPI journal article supplement (doi:10.3390/land13091434), 2024-09-05
Supplement: s1 [file File S1 Preliminary indicator of the evaluation of the RSS of smart community development.pdf › File S1 Preliminary indicator of the evaluation of the RSS of smart community development.pdf]

**Table S1** Preliminary indicator of the evaluation of the RSS of smart community development

| First-level indicator       | Second-level indicator                                                                                                                                                                                                                    | Indicator source |
|-----------------------------|-------------------------------------------------------------------------------------------------------------------------------------------------------------------------------------------------------------------------------------------|------------------|
| Smart property service      | Garbage harmless treatment, Noise treatment, Environmental pollution treatment, Travel at night, Community security staffing, Stranger in and out, Public safety evaluation                                                               | [1–3]            |
| Smart logistics service     | Express delivery and storage safety, Express information protection                                                                                                                                                                       | [4,5]            |
| Smart housekeeping service  | Visitors from the living, Student trusteeship safety, Child care safety, Safety for the elderly                                                                                                                                           | [6]              |
| Smart medical service       | Patient privacy protection, Community hospital safety management, Licensed doctors, Drug supervision                                                                                                                                      | [1,7]            |
| Smart business service      | Food safety inspection, Catering industry safety inspections                                                                                                                                                                              | [2,8]            |
| Smart emergency service     | Emergency supplies stockpile, Emergency staffing, Emergency assistance, Fire monitoring and alarm, Electronic fence, Natural disaster response, Public accident response, Public health incident response, Accident and disaster response | [3,9–11]         |
| Smart communication service | Safety education, Safety service organization development, Community safety culture, Safety themed communication platform                                                                                                                 | [12,13]          |
| Smart home service          | Indoor environmental safety monitoring, Intermodal alarm                                                                                                                                                                                  | [14,15]          |
| Smart management            | Safety management system, Privacy protection, Safety warning, Complaint and suggestions, Safety facilities, Emergency repair of facilities, Emergency rescue, Handling of objects dropped from height, Road patrol                        | [5,15]           |

## References

1. Gu, T.; Hao, E.; Wang, C.; Zhu, S.; Wang, Y. CRITIC-PROMETHEE II-Based Evaluation of Smart Community Services: A Case Study of Shenzhen, China. *J. Knowl. Econ.* **2024**, doi:10.1007/s13132-024-02114-5.
2. Shi, H.; Tsai, S.-B.; Lin, X.; Zhang, T. How to Evaluate Smart Cities' Construction? A Comparison of Chinese Smart City Evaluation Methods Based on PSF. *Sustainability* **2017**, *10*, 37, doi:10.3390/su10010037.
3. Whitzman, C. Community Safety Indicators: Are We Measuring What Counts? *Urban Policy Res.* **2008**, *26*, 197–211, doi:10.1080/08111140701665849.

4. Yang, L.; Deng, H.; Dang, X. Preference Preserved Privacy Protection Scheme for Smart Home Network System Based on Information Hiding. *IEEE Access* **2020**, *8*, 40767-40776, doi:10.1109/ACCESS.2020.2976782.
5. Yin, J.; Wang, J.; Wang, C.; Wang, L.; Chang, Z. CRITIC-TOPSIS Based Evaluation of Smart Community Governance: A Case Study in China. *Sustainability* **2023**, *15*, 1923, doi:10.3390/SU15031923/S1.
6. Lv, M.; Wang, N.; Yao, S.; Wu, J.; Fang, L. Towards healthy aging: Influence of the built environment on elderly pedestrian safety at the micro-level. *Int. J. Environ. Res. Public Health* **2021**, *18*, doi:10.3390/IJERPH18189534.
7. Guo, S.; Dang, Y.; She, B.; Li, Y. Sharing intention of electronic health records in online health communities: Patients' behavioral decisions in the context of privacy protection measures. *Front. Psychol.* **2022**, *13*, doi:10.3389/FPSYG.2022.1047980.
8. Green, R.M.; Kane, K. The effective enforcement of HACCP based food safety management systems in the UK. *Food Control* **2014**, *37*, 257-262, doi:10.1016/J.FOODCONT.2013.09.016.
9. Solansky, S.T.; Beck, T.E. Enhancing Community Safety and Security Through Understanding Interagency Collaboration in Cyber-Terrorism Exercises. *Adm. Soc.* **2009**, *40*, 852-875, doi:10.1177/0095399708326345.
10. Zhao, Z.L. Community Public Safety Evaluation System Based on Location Information Service Architecture. *Mob. Inf. Syst.* **2021**, *2021*, doi:10.1155/2021/6694757.
11. Bhattarai, H.K.; Hung, K.K.C.; MacDermot, M.K.; Hubloue, I.; Barone-Adesi, F.; Ragazzoni, L.; Della Corte, F.; Acharya, R.; Graham, C.A. Role of Community Health Volunteers since the 2015 Nepal Earthquakes: A Qualitative Study. *Disaster Med. Public Health Prep.* **2022**, doi:10.1017/DMP.2022.47.
12. Ncube, A.; Tawodzera, M. Communities' perceptions of health hazards induced by climate change in Mount Darwin district, Zimbabwe. *Jamba (Potchefstroom, South Africa)* **2019**, *11*, 1-11, doi:10.4102/JAMBA.V11I1.748.
13. Dong, F.; Yin, J.; Xiang, J.; Chang, Z.; Gu, T.; Han, F. EWM-FCE-ODM-Based Evaluation of Smart Community Construction: From the Perspective of Residents' Sense of Gain. *Sustain.* **2023**, *15*, 6587, doi:10.3390/SU15086587/S1.
14. Figueroa-Lorenzo, S.; Goya, J.; Anorga, J.; Adin, I.; Mendizabal, J.; Arrizabalaga, S. Alarm Collector in Smart Train Based on Ethereum Blockchain Events-Log. *IEEE Internet Things J.* **2021**, *8*, 13306-13315, doi:10.1109/JIOT.2021.3065631.
15. Wang, C.; Wang, L.; Gu, T.; Yin, J.; Hao, E. CRITIC-TOPSIS-Based Evaluation of Smart Community Safety: A Case Study of Shenzhen, China. *Buildings* **2023**, *13*, 476, doi:10.3390/BUILDINGS13020476/S1.
