# Supplementary material for: Evaluating Smart Community Development in China from the Perspective of Residents’ Sense of Safety: An Analysis Using Criteria Importance through Intercriteria Correlation and Fuzzy Comprehensive Evaluation Approaches
Source: MDPI journal article supplement (doi:10.3390/land13091434), 2024-09-05
Supplement: s1 [file File S2 Detailed information on effective experts.pdf › File S2 Detailed information on effective experts.pdf]

**Flie S2****Table S2.** Detailed information on effective experts.

| Individual characteristics | Items                     | Percentage (%) |
|----------------------------|---------------------------|----------------|
| Gender                     | Male                      | 57.69%         |
|                            | Female                    | 42.31%         |
| Education level            | Doctorate degree          | 19.23%         |
|                            | Master's degree           | 50.00%         |
|                            | Others                    | 30.77%         |
| Occupation                 | College teachers          | 19.23%         |
|                            | Government employee       | 3.85%          |
|                            | Manager of the enterprise | 46.15%         |
|                            | Others                    | 30.77%         |
| Working experience         | More than 5 years         | 19.23%         |
|                            | 3 to 5 years              | 15.39%         |
|                            | 1 to 3 years              | 26.92%         |
|                            | Less than 1 year          | 38.46%         |
