# Supplementary material for: Evaluating Smart Community Development in China from the Perspective of Residents’ Sense of Safety: An Analysis Using Criteria Importance through Intercriteria Correlation and Fuzzy Comprehensive Evaluation Approaches
Source: MDPI journal article supplement (doi:10.3390/land13091434), 2024-09-05
Supplement: s1 [file File S3 Questionnaire about assessment of the RSS of smart community development.pdf › File S3 Questionnaire about assessment of the RSS of smart community development.pdf]

## Questionnaire on the RSS of smart community development based on index screening

Dear experts,

Thank you for participation in the questionnaire survey. This is the research team from Department Engineering Management of School of Mechanics and Civil Engineering, China University of Mining and Technology by Prof. Linxiu Wang and Lecturer Tiantian Gu.

This survey focuses on how to evaluate the RSS of smart community development by considering the multi-level evaluation indicators. The multi-level assessment system has been developed as shown in Figure S3-1. Now, we try to determine the indicators based on your valuable opinions. Please mark in Table S3-1~S3-11 according to your knowledge and experience.

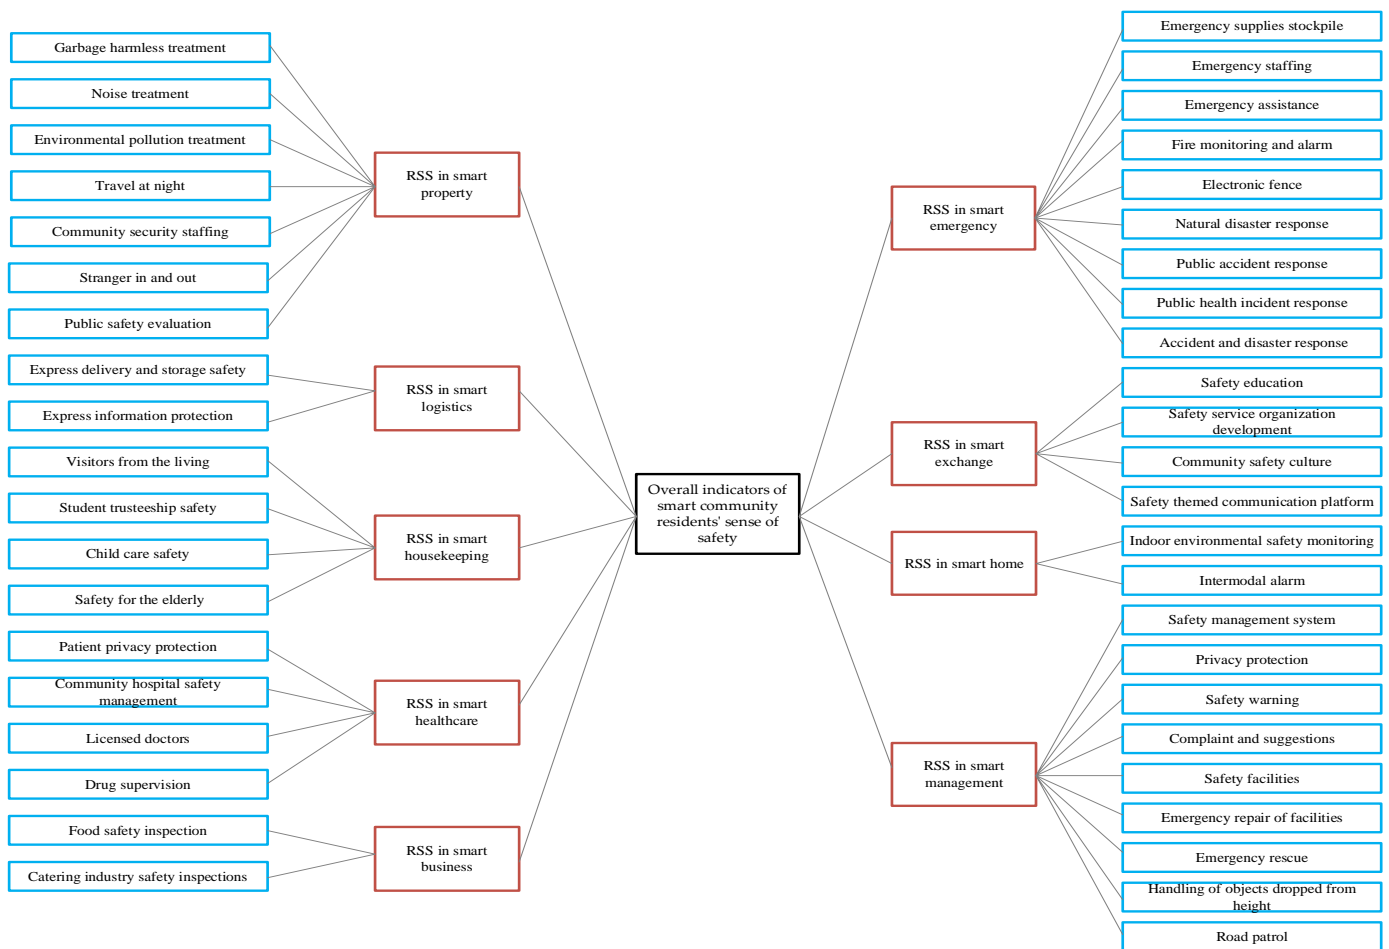

Figure S2-1. The assessment indicators of the RSS of smart community development.

### 1. Basic information of researchers and experts.

Table S3-1. Respondent information.

| Individual characteristics | Items  | Symbol (√) |
|----------------------------|--------|------------|
| Gender                     | Male   |            |
|                            | Female |            |
| Education level            | Doctor |            |
|                            | Master |            |
|                            | Others |            |

|                    |                     |  |
|--------------------|---------------------|--|
| Working experience | More than 5 years   |  |
|                    | 3 to 5 years        |  |
|                    | 1 to 3 years        |  |
|                    | Less than 1 year    |  |
| Occupation         | College teachers    |  |
|                    | Government staff    |  |
|                    | Enterprise managers |  |
|                    | Others              |  |

## 2. Scoring sheets of evaluation indicators for the RSS of smart community development.

Please mark in Table S3-2~S3-10 according to your knowledge and experience. Ranging from 1(Very unimportant) to 5 (Very important). '√' is used for score marking. Please fill in more suggestions in Table S3-11, if there are any deficiencies in the following options.

**Table S3-2.** Scoring sheet for smart property service.

| Dimension              | Indicators                        | Score |   |   |   |   |
|------------------------|-----------------------------------|-------|---|---|---|---|
|                        |                                   | 1     | 2 | 3 | 4 | 5 |
| Smart property service | Garbage harmless treatment        |       |   |   |   |   |
|                        | Noise treatment                   |       |   |   |   |   |
|                        | Environmental pollution treatment |       |   |   |   |   |
|                        | Travel at night                   |       |   |   |   |   |
|                        | Community security staffing       |       |   |   |   |   |
|                        | Stranger in and out               |       |   |   |   |   |
|                        | Public safety evaluation          |       |   |   |   |   |

**Table S3-3.** Scoring sheet for smart logistics service.

| Dimension               | Indicators                          | Score |   |   |   |   |
|-------------------------|-------------------------------------|-------|---|---|---|---|
|                         |                                     | 1     | 2 | 3 | 4 | 5 |
| Smart logistics service | Express delivery and storage safety |       |   |   |   |   |
|                         | Express information protection      |       |   |   |   |   |

**Table S3-4.** Scoring sheet for smart housekeeping service.

| Dimension                  | Indicators                 | Score |   |   |   |   |
|----------------------------|----------------------------|-------|---|---|---|---|
|                            |                            | 1     | 2 | 3 | 4 | 5 |
| Smart housekeeping service | Visitors from the living   |       |   |   |   |   |
|                            | Student trusteeship safety |       |   |   |   |   |
|                            | Child care safety          |       |   |   |   |   |
|                            | Safety for the elderly     |       |   |   |   |   |

**Table S3-5.** Scoring sheet for smart medical service.

| Dimension             | Indicators                           | Score |   |   |   |   |
|-----------------------|--------------------------------------|-------|---|---|---|---|
|                       |                                      | 1     | 2 | 3 | 4 | 5 |
| Smart medical service | Patient privacy protection           |       |   |   |   |   |
|                       | Community hospital safety management |       |   |   |   |   |
|                       | Licensed doctors                     |       |   |   |   |   |
|                       | Drug supervision                     |       |   |   |   |   |

**Table S3-6.** Scoring sheet for smart business service.

| Dimension              | Indicators                           | Score |   |   |   |   |
|------------------------|--------------------------------------|-------|---|---|---|---|
|                        |                                      | 1     | 2 | 3 | 4 | 5 |
| Smart business service | Food safety inspection               |       |   |   |   |   |
|                        | Catering industry safety inspections |       |   |   |   |   |

**Table S3-7.** Scoring sheet for smart emergency service.

| Dimension               | Indicators                      | Score |   |   |   |   |
|-------------------------|---------------------------------|-------|---|---|---|---|
|                         |                                 | 1     | 2 | 3 | 4 | 5 |
| Smart emergency service | Emergency supplies stockpile    |       |   |   |   |   |
|                         | Emergency staffing              |       |   |   |   |   |
|                         | Emergency assistance            |       |   |   |   |   |
|                         | Fire monitoring and alarm       |       |   |   |   |   |
|                         | Electronic fence                |       |   |   |   |   |
|                         | Natural disaster response       |       |   |   |   |   |
|                         | Public accident response        |       |   |   |   |   |
|                         | Public health incident response |       |   |   |   |   |
|                         | Accident and disaster response  |       |   |   |   |   |

**Table S3-8.** Scoring sheet for smart communication service.

| Dimension                   | Indicators                              | Score |   |   |   |   |
|-----------------------------|-----------------------------------------|-------|---|---|---|---|
|                             |                                         | 1     | 2 | 3 | 4 | 5 |
| Smart communication service | Safety education                        |       |   |   |   |   |
|                             | Safety service organization development |       |   |   |   |   |
|                             | Community safety culture                |       |   |   |   |   |
|                             | Safety themed communication platform    |       |   |   |   |   |

**Table S3-9.** Scoring sheet for smart home service.

| Dimension          | Indicators                             | Score |   |   |   |   |
|--------------------|----------------------------------------|-------|---|---|---|---|
|                    |                                        | 1     | 2 | 3 | 4 | 5 |
| Smart home service | Indoor environmental safety monitoring |       |   |   |   |   |
|                    | Intermodal alarm                       |       |   |   |   |   |

**Table S3-10.** Scoring sheet for smart management.

| Dimension        | Indicators                | Score |   |   |   |   |
|------------------|---------------------------|-------|---|---|---|---|
|                  |                           | 1     | 2 | 3 | 4 | 5 |
| Smart management | Safety management system  |       |   |   |   |   |
|                  | Privacy protection        |       |   |   |   |   |
|                  | Safety warning            |       |   |   |   |   |
|                  | Complaint and suggestions |       |   |   |   |   |

|  |                                            |  |  |  |  |  |
|--|--------------------------------------------|--|--|--|--|--|
|  | Safety facilities                          |  |  |  |  |  |
|  | Emergency repair of facilities             |  |  |  |  |  |
|  | Emergency rescue                           |  |  |  |  |  |
|  | Handling of objects dropped<br>from height |  |  |  |  |  |
|  | Road patrol                                |  |  |  |  |  |

### 3. More suggestions.

**Table S3-11.** More suggestions of the residents' sense of safety for smart community.

|  |
|--|
|  |
|--|

Thanks a lot for your cooperation!
