# Supplementary material for: Evaluating Smart Community Development in China from the Perspective of Residents’ Sense of Safety: An Analysis Using Criteria Importance through Intercriteria Correlation and Fuzzy Comprehensive Evaluation Approaches
Source: MDPI journal article supplement (doi:10.3390/land13091434), 2024-09-05
Supplement: s1 [file File S5 The name and code of each community.pdf › File S5 The name and code of each community.pdf]

The name and code of each community.

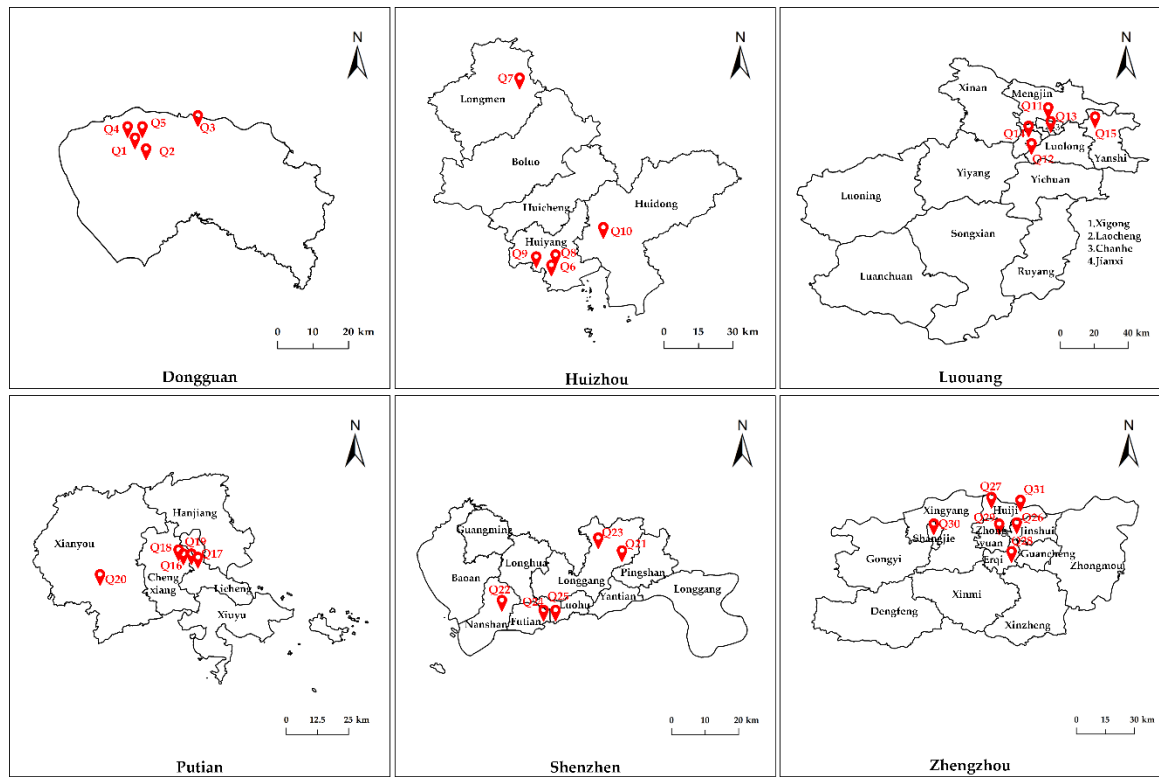

**Figure S3.** Location of the smart communities for evaluating the RSS of smart community development. Note: Q1: Batou community; Q2: hongtu community. Q3: Baoshi community; Q4: Shimei community; Q5: Wanjiang community; Q6: Banzhangling community; Q7: Qingxi community; Q8: Siqian community; Q9: Tangjing community; Q10: Tongxin community; Q11: Chaoyang community; Q12: Letian community; Q13: Xiguan community; Q14: Xiyaun community; Q15: Xinglong community; Q16: Beimo community; Q17: Fengshan community; Q18: Longqiao community; Q19: Yinglong community; Q20: Yunei community; Q21: Baolong community; Q22: Fuguang community; Q23: Huilongpu community; Q24: Nanyuan community; Q25: Yucun community; Q26: Dongfenglu community; Q27: Haichuan community; Q28: Jinghu community; Q29: Kaiyuan community; Q30: Longjiangbeili community; Q31: Yingbinlu community.
