# Supplementary material for: Evaluating Smart Community Development in China from the Perspective of Residents’ Sense of Safety: An Analysis Using Criteria Importance through Intercriteria Correlation and Fuzzy Comprehensive Evaluation Approaches
Source: MDPI journal article supplement (doi:10.3390/land13091434), 2024-09-05
Supplement: s1 [file File S6 Questionnaire about evaluation of the RSS of smart community development.pdf › File S6 Questionnaire about evaluation of the RSS of smart community development.pdf]

Flie S6

## Questionnaire about Evaluation of Residents' Sense of Safety of Smart Community Development

Dear Sir/Madam:

Thank you for participation in the questionnaire survey. This research group is conducting academic research on the residents' experience in smart communities in the new era. In order to better construct the evaluation indicator of residents' experience in smart communities in the new era, we need your valuable opinions. Please take a few minutes to fill out this questionnaire, which is anonymous. All data are only used for statistical analysis. Please feel free to fill it out. Thank you again for your participation!

### 1. Basic information of respondent.

City: \_\_\_\_\_

Community: \_\_\_\_\_

1. What is your gender?

(1) Male      (2) Female

2. What is your age?

(1) Under 20    (2) 21-35    (3) 36-49    (4) 50-64    (5) Above 65

3. What is your education level?

(1) Primary school or below    (2) Middle school    (3) High school    (4) College and undergraduate

(5) Master or above

4. How long have you been here?

(1) 1 years or less    (2) 2-3 years    (3) 3-5 years    (4) Above 5 years    (5) Other

5. Your ownership of household?

(1) Rent    (2) Own    (3) Other

6. What is your occupation?

(1) Civil servant    (2) Employees of state-owned enterprises and institutions    (3) Employees of private enterprise or foreign enterprises    (4) Self-employed    (5) Student    (6) Other

7. What is your monthly income?

(1) <3000 RMB    (2) 3000-5000 RMB    (3) 5000-7000 RMB    (4) 7000-9000 RMB    (5) > 9000 RMB

### 2. Scoring sheets of smart community development evaluation from residents' sense of safety.

Please evaluate the residents' sense of safety for smart community which you live in based on your personal life experience from 1(Very unimportant) to 5 (Very important). '√' is used for score marking. Please fill in more suggestions in Table S6-2, if there are any deficiencies in the following options.

Table S6-1. Respondent information.

| Indicators           | Description                                       | Score |   |   |   |   |
|----------------------|---------------------------------------------------|-------|---|---|---|---|
|                      |                                                   | 1     | 2 | 3 | 4 | 5 |
| Overall design (SS1) | The sense of safety of this community master plan |       |   |   |   |   |

|                                           |                                                                                                                                                                                                                                                                                                                                                                                                                                        |  |  |  |  |  |
|-------------------------------------------|----------------------------------------------------------------------------------------------------------------------------------------------------------------------------------------------------------------------------------------------------------------------------------------------------------------------------------------------------------------------------------------------------------------------------------------|--|--|--|--|--|
|                                           | and implementation plan, i.e. your experience of the science, completeness and feasibility of this community master plan design and smart building plan.                                                                                                                                                                                                                                                                               |  |  |  |  |  |
| Construction guarantees (SS2)             | The sense of safety of the various types of security conditions in the smart construction of this community, i.e. your experience of the organizational security, financial security, institutional security, talent security and operation and maintenance security in the smart construction of this community.                                                                                                                      |  |  |  |  |  |
| Platform data security (SS3)              | The sense of safety of this community information service platform, i.e. your experience of the community information service platform's establishment of a complete data security system to protect residents' personal privacy.                                                                                                                                                                                                      |  |  |  |  |  |
| Resident health screening (MS1)           | The sense of safety about the health screening provided by our community, i.e. your experience of free medical check-ups, medical consultations and disease prevention and awareness services.                                                                                                                                                                                                                                         |  |  |  |  |  |
| Emergency ambulance (MS2)                 | The sense of safety in providing emergency rescue services in this community is the experience of providing emergency rescue services in this community through healthy huts or peace of mind stations.                                                                                                                                                                                                                                |  |  |  |  |  |
| Emergency services for the elderly (PS1)  | The sense of safety in providing emergency services for the elderly to residents in this community means setting up a one-click call button based on internet plus technology platform, which is convenient for the elderly living at home to dock with their families, community party organizations and neighborhood committees, and ensures that the elderly can find the experience of docking people in time when they need help. |  |  |  |  |  |
| Cultural activities for the elderly (PS2) | The sense of safety in providing cultural activities for the elderly to residents in this community means your experience in setting up classes for the elderly and carrying out educational activities such as health care and first aid for the elderly in this community.                                                                                                                                                           |  |  |  |  |  |
| Electric vehicle charging pile (BS1)      | The sense of safety of electric vehicle charging piles in this community means that the community uses intelligent technical means to provide electric vehicle charging services for different users and configure intelligent fire monitoring and early warning facilities and automatic fire extinguishing facilities.                                                                                                               |  |  |  |  |  |
| Smart catering service (BS2)              | The sense of safety for smart catering services in this community means your experience of online purchase, independent settlement and intelligent distribution provided by unmanned shops,                                                                                                                                                                                                                                            |  |  |  |  |  |

|                                         |                                                                                                                                                                                                                                                                                                                                                                                                                                       |  |  |  |  |  |
|-----------------------------------------|---------------------------------------------------------------------------------------------------------------------------------------------------------------------------------------------------------------------------------------------------------------------------------------------------------------------------------------------------------------------------------------------------------------------------------------|--|--|--|--|--|
|                                         | restaurants and supermarkets in the community, which can timely carry out safety inspection and product quality after-sales guarantee.                                                                                                                                                                                                                                                                                                |  |  |  |  |  |
| Intelligent access control (ProS1)      | The sense of safety about intelligent access control in this community means your experience about swiping the card to open the door, calling to open the door, face recognition to open the door, QR code to open the door, visitor registration and so on.                                                                                                                                                                          |  |  |  |  |  |
| Community security (ProS2)              | The sense of safety about community security service in this community means the experience of conducting community security patrol jointly with the intelligent platform in the community and community security personnel, and equipped with community security monitoring system.                                                                                                                                                  |  |  |  |  |  |
| Intelligent firefighting (ProS3)        | The sense of safety about the intelligent fire service in this community is the experience of setting up intelligent fire facilities such as intelligent fire grid patrol management system, intelligent fire hydrant, fire alarm positioning system, fire alarm equipment, fire information transmission equipment and automatic fire extinguishing equipment in the smart community, and maintaining and managing these facilities. |  |  |  |  |  |
| Facility and equipment repair (ProS4)   | The sense of safety in the emergency repair of facilities in this community means that you can get emergency repair in time when the facilities and home facilities in this community fail.                                                                                                                                                                                                                                           |  |  |  |  |  |
| Environmental enhancement (ProS5)       | The sense of safety in improving the environment in this community, that is, taking intelligent watering and intelligent pollution monitoring for community environmental management personnel has a positive impact on your health.                                                                                                                                                                                                  |  |  |  |  |  |
| Natural disaster response (ES1)         | The sense of safety in dealing with natural disasters in your community means your experience in using intelligent systems or platforms to monitor natural disasters such as floods and droughts, meteorological disasters and earthquake disasters in your community, and quickly respond and deal with them.                                                                                                                        |  |  |  |  |  |
| Social security incident response (ES2) | The sense of safety in dealing with social security incidents in your community means your experience in using intelligent systems or platforms to monitor social security incidents such as group incidents, criminal incidents and foreign-related emergencies, and quickly respond and deal with them.                                                                                                                             |  |  |  |  |  |
| Public health incident response (ES3)   | The sense of safety in dealing with public health incidents in your community means your experience in using intelligent systems or platforms to monitor the epidemic situation of infectious diseases, mass unexplained diseases                                                                                                                                                                                                     |  |  |  |  |  |

|                                              |                                                                                                                                                                                                                                                                                                         |  |  |  |  |  |
|----------------------------------------------|---------------------------------------------------------------------------------------------------------------------------------------------------------------------------------------------------------------------------------------------------------------------------------------------------------|--|--|--|--|--|
|                                              | and other events that seriously affect public life safety, and to respond and deal with them quickly.                                                                                                                                                                                                   |  |  |  |  |  |
| Accident disaster response (ES4)             | The sense of safety in dealing with accidents and disasters in your community means your experience in using intelligent systems or platforms to monitor accidents and disasters such as high-altitude parabolic, fire, gas explosion and traffic accidents, and to respond and deal with them quickly. |  |  |  |  |  |
| Emergency assistance alarm (ES5)             | The sense of safety of emergency rescue alarm in this community means your experience of setting emergency help buttons in public areas of this community to push alarm information to emergency contacts or properties.                                                                                |  |  |  |  |  |
| Emergency cover (ES6)                        | The sense of safety for emergency support in this community means your experience in accident early warning, emergency broadcast, emergency watch, emergency shelter guidance, emergency material reserve and so on.                                                                                    |  |  |  |  |  |
| Safety awareness and education (ES7)         | The sense of safety of publicity and education in this community is the experience of setting up a special area for safety knowledge popularization and education and giving lectures on safety management knowledge and skills.                                                                        |  |  |  |  |  |
| Legal advocacy and assistance services (GS1) | The sense of safety in legal publicity and aid services in this community means your experience in popularizing legal knowledge and legal aid in the community by combining information technology with traditional means.                                                                              |  |  |  |  |  |
| Community culture (GS2)                      | The sense of safety about the community culture in this community is the experience of using information channels to carry out safety publicity, "safety knowledge quiz" and other activities.                                                                                                          |  |  |  |  |  |

### 3. More suggestions.

**Table S6-2.** More suggestions of the residents' sense of safety for smart community.

|  |
|--|
|  |
|--|

**Thanks a lot for your cooperation!**
